# Supplementary material for: X‐ray computed tomography and its potential in ecological research: A review of studies and optimization of specimen preparation
Source: PubMed Central journal article supplement (PMC6106166; doi:10.1002/ece3.4149), 2018-07-06
Supplement: ECE3-8-7717-s004.pdf [file ECE3-8-7717-s004.pdf]

| <b>Manufacturer</b>                  | <b>Model/Series</b>                |
|--------------------------------------|------------------------------------|
| Perkin Elmer (Caliper LifeSciences)  | Quantum GX microCT                 |
|                                      | IVIS SpectrumCT                    |
| CT imaging                           | TomoScope® Synergy                 |
| FEI                                  | HeliScan microCT                   |
| GE Measurement and Control Solutions | phoenix nanotom - microCT & nanoCT |
|                                      | phoenix v tome x - CT              |
| Hitachi Aloka Medical                | LaTheta LCT-200 Series             |
| inviscan imaging systems             | IRIS PET/CT                        |
| Mediso                               | NanoScan SPECT/CT,                 |
|                                      | NanoScan PET/CT                    |
|                                      | NanoSPECT/CT                       |
| Milabs                               | U-CT                               |
|                                      | U-SPECT/CT                         |
|                                      | VECTor/CT                          |
| NanoFocus Ray                        | NFR Polaris-G90                    |
| Nikon Metrology                      | MCT 225                            |
|                                      | XT H 225                           |
| North Star Imaging                   | ImagiX                             |
|                                      | X25                                |
|                                      | X50                                |
| Precision X-Ray                      | X-RAD SmART                        |
| RX Solutions                         | EasyTom                            |
|                                      | DeskTom                            |
|                                      | UltraTom                           |
| Rigaku                               | nano3DX                            |
|                                      | CT Lab                             |
| Scanco Medical                       | μCT 35                             |
|                                      | μCT 40                             |
|                                      | μCT 50                             |
|                                      | μCT 100                            |
|                                      | vivaCT 40                          |
|                                      | vivaCT 75                          |
|                                      | vivaCT 80                          |
|                                      | XtremeCT                           |
| Sedecal                              | SuperArgus PET/CT                  |
| Bruker microCT                       | SkyScan 1172                       |
|                                      | SkyScan1173                        |
|                                      | SkyScan1174                        |
|                                      | SkyScan1176                        |
|                                      | Skyscan1272                        |
|                                      | SkyScan1278                        |
|                                      | Skyscan 1294                       |
|                                      | SkyScan2011                        |
|                                      | Skyscan 2211                       |
| Toshiba IT & Control Systems         | Toscaner 30000-μhd                 |
| TriFoil Imaging                      | InSyTe CT                          |
|                                      | TomoScope® XS                      |

|             |                  |
|-------------|------------------|
| Werth, Inc. | TomoScope® 200   |
|             | TomoScope® HV    |
|             | TomoCheck® HA    |
| Zeiss       | Xradia 520 Versa |
|             | Xradia 510 Versa |
|             | Xradia 410 Versa |
|             | Xradia 810 Ultra |
|             | Xradia 800 Ultra |
| Xstrahl     | SARRP            |
